# The Anesthesiologist's Bookshelf

Edited by HUBERTA M. LIVINGSTONE, M.D.

**Recent Advances in Anaesthesia and Analgesia.** NINTH EDITION. EDITED BY C. LANGTON HEWER, M.B., B.S. (Lond.), M.R.C.P. (Lond.), F.F.A.R.C.S., Consulting Anaesthetist to St. Bartholomew's Hospital and to the Hospital for Tropical Diseases, London. Cloth. \$11.50. Pp. 358, with 48 illustrations. Little, Brown & Company, Boston, 1963.

The Ninth Edition of this classic treatise has been published with the same editor as the first edition, 31 years ago. Advances in anesthesia have been so rapid that it is no longer possible for one author to summarize all the new work. Hence, aspects of various subjects in this volume have been written by ten contributing anesthesiologists, each one an authority in the particular field, under the direction of the editor. *Inhalation Anesthesia* is discussed by J. Parkhouse; *Intravenous Anesthesia* by J. D. Robertson; *Muscle Relaxants* by H. C. Churchill-Davidson; *Hypothermia* by B. A. Sellick; *Anesthesia for Neurosurgery* by R. W. Ballentine; *Anesthesia for Cardiac Surgery* by A. I. Perry Brown; *Anesthesia for Diagnostic Procedures* by R. B. Boulton; *Obstetric Anesthesia and Analgesia, Resuscitation of the Newborn* by the late R. J. H. Hodges and M. E. Tunstall; *Mechanical Ventilation of the Lungs* and *The Management of Patients During Artificial Ventilation*, by A. R. Hunter; and *Anesthesia Associated with Latrogenic Conditions*, by J. W. Dundee. Each chapter contains a review of current advances in knowledge in particular subjects. In general it may be stated that each author presents a scholarly account of a large mass of information. There is very little overlapping. There is a liberal amount of charts, drawings and illustrations. Each review is followed by an up-to-date list of references. This is an excellent source of new knowledge for practicing anesthesiologists and for those preparing for examinations.

RICHARD FOREGGER, M.D.

**Atlas of Vascular Surgery.** BY FALLS B. HERSHEY, M.D., F.A.C.S., Associate Professor of Clinical Surgery, Washington University School of Medicine, St. Louis, Mo., AND CARL H. CALMAN, M.D., F.A.C.S., Assistant in Clinical Surgery, Washington University School of Medicine, St. Louis. Illustrated by Kathryn Murphy and William R. Schwartz. Cloth. \$18.00. Pp. 307 with 76 figures and 2 tables. The C. V. Mosby Co., St. Louis, Missouri, 1963.

The purpose of this book, as stated in the Preface, is "to instruct residents as well as practicing surgeons in the methods and techniques of vascular surgery." The authors have achieved their objective eminently well and in commendable fashion. They have drawn upon their broad experience to frame their information in succinct sentences, each one of which is meaningful. The pitfall of window-dressing their work with references historical in nature has been successfully avoided. The text is easily readable. The illustrations, beautifully done and reproduced on glossy paper, compliment their descriptions. The material is well organized and surgeons will find information they seek easy to find and rewarding.

Anesthesiologists will be interested to know that full credit is given to the advent of general anesthesia along with antiseptic and aseptic surgical techniques for extension and development of the surgical art to its present-day refinement. The authors do not presume to inform anesthesiologists of details of anesthetic techniques. Preferences for local, general and spinal anesthesia are expressed in relation to the surgical problems involved, as for example, "General endotracheal anesthesia is desirable since there is some chance of entering the pleural cavity superiorly" (page 206). In their discussion of portal hypertension the authors surprised this reviewer with their verbosity. A paragraph of eight lines in reference to anesthesia appears on page 194. They have likewise limited their discussion to
